# Supplementary material for: A feedback loop between CaWRKY41 and H2O2 coordinates the response to Ralstonia solanacearum and excess cadmium in pepper
Source: PubMed Central journal article supplement (PMC6416791; doi:10.1093/jxb/erz006), 2019-01-14
Supplement: erz006_suppl_supplementary_figures_s1-s9.pdf [file erz006_suppl_supplementary_figures_s1-s9.pdf]

## **Supplementary data**

**Table S1.** Sequences of primers used in this study.

**Table S2.** *CaWRKY* groupIII genes.

**Table S3.** Analysis of the *C/S*-elements in the 2-kb promoter fragment of *CaWRKY* groupIII genes.

**Table S1.** Sequences of primers used in this study

| Primer Name                   | Forward (5'-3')                                                         | Reverse (5'-3')                                                        |
|-------------------------------|-------------------------------------------------------------------------|------------------------------------------------------------------------|
| <b>For cloning*</b>           |                                                                         |                                                                        |
| <i>CaWRKY41</i><br>(CDS)      | <u>GGGGACAAGTTTGTACAAAAAAGCAGG</u><br><u>CTTCATGGAGAAAGTTAAAGGATTGG</u> | <u>GGGGACCACTTTGTACAAGAAAGCTG</u><br><u>GGTCTTAACTAAAGAACTCTTCAATG</u> |
| <i>CaWRKY41</i><br>(promoter) | <u>GGGGACAAGTTTGTACAAAAAAGCAGG</u><br><u>CTGAATAGAACCCTATCCGACG</u>     | <u>GGGGACCACTTTGTACAAGAAAGCTG</u><br><u>GGTTTTGTTGTAAAAACTCAAAT</u>    |
| <i>CaWRKY41</i><br>(VIGS)     | <u>GGGGACAAGTTTGTACAAAAAAGCAGG</u><br><u>CTTCAAAAAACGCCAGAAACACA</u>    | <u>GGGGACCACTTTGTACAAGAAAGCTG</u><br><u>GGTCAATCCCAATCTCCGACAAATGA</u> |
| <b>For RT-qPCR</b>            |                                                                         |                                                                        |
| <i>CaWRKY41</i>               | CACCAAACCATGACGCAGAA                                                    | TGAGCAGTGCAGAGTCATGT                                                   |
| <i>CaWRKY53a</i>              | TGGAGAAAGTACGGCCAGAA                                                    | TCTCGTTTCTCTGGCGATGT                                                   |
| <i>CaWRKY52</i>               | TCGTGGAAGCTTCAAAGTCA                                                    | ACACATGAAACACACTACCGA                                                  |
| <i>CaWRKY53</i>               | CTCAACAGTCCACTCCTCGA                                                    | TCTCCGCACTGACTTTGACT                                                   |
| <i>CaWRKY54</i>               | TGTCTCTCCTACAACCCCTG                                                    | TCTAGCTCCACACGTTCAAGT                                                  |
| <i>CaWRKY70</i>               | TGGAGGAAATACGGGCAGAA                                                    | TGCTTCCGAATCTTTGCTGG                                                   |
| <i>CaWRKY30</i>               | GGTCATCACTCGTGCACAAC                                                    | CATCGGATTGACTTTGGCCA                                                   |
| <i>CaWRKY41a</i>              | TCCATACTTGTCGCGAAGT                                                     | GGCTGCCGAAACTGATAAG                                                    |
| <i>CaCAT1</i>                 | TGTTGCTGGTGTGGTGTGGT                                                    | GCCTCTCCTAGACGGCCTTTCA                                                 |
| <i>CaAPX1</i>                 | CAGGCAGAGGCAAGGGAGGTAA                                                  | CCCTACGAGCGAGCCTACGAAT                                                 |
| <i>CaAPX2</i>                 | TGATGCTCTGCCAATATCGGAT                                                  | CCAATTCCTCCCATGCCAAC                                                   |
| <i>CaCSD2</i>                 | TGTGGATGTGGCTTTGGTTCCC                                                  | TGAGGAAGGGAGTTTGCGACAC                                                 |
| <i>CaSOD1</i>                 | ACACAACCTCCACCATAGAGCCT                                                 | CCACCAACAATCGCACCAACAT                                                 |
| <i>CaPR1</i>                  | GCCGTGAAGATGTGGGTCAATGA                                                 | TGAGTTACGCCAGACTACCTGAGTA                                              |
| <i>CaPR4</i>                  | CAACCCGCAGAACATCAACTGG                                                  | CCTCAAGCATCTACCGCAAGCA                                                 |
| <i>CaNPR1</i>                 | ACTTCTTCGCCGACGCCAAG                                                    | GCCAACACATTCACCAGAGCATC                                                |
| <i>CaActin</i>                | AGGGATGGGTCAAAGGATGC                                                    | GAGACAACACCGCCTGAATAGC                                                 |
| <i>AtRBOHC</i>                | TCACCAGAGACTGGCACAATAAA                                                 | GATGCTCGACCTGAATGCTC                                                   |
| <i>AtRBOHD</i>                | TATGCATCGGAGAGGCTGCT                                                    | TAGAGACAACACGTTCCCGGG                                                  |
| <i>AtRBOHE</i>                | GTGATGCAAGATCAACCCTGA                                                   | GCCTTGCAAAATGTGTTCTCA                                                  |
| <i>AtRBOHF</i>                | GGTGTCATGAACGAAGTTGCA                                                   | AATGAGAGCAGAACGAGCATCA                                                 |
| <i>AtCAT1</i>                 | AAGTGCTTCATCGGAAGGA                                                     | CTTCAACAAAACGCTTCACGA                                                  |
| <i>AtAPX1</i>                 | TGCCACAAGGATAGGTCTGG                                                    | CCTTCCTTCTCTCCGCTCAA                                                   |

|                |                           |                            |
|----------------|---------------------------|----------------------------|
| <i>AtSOD1</i>  | TCCATGCAGACCCTGATGAC      | CCTGGAGACCAATGATGCC        |
| <i>AtSOD2</i>  | GAGCCTTTGTGGTTCACGAG      | CACACCACATGCCAATCTCC       |
| <i>AtGST2</i>  | ATCACCAGTTCGACCCAGTG      | CTCCTCTTCTGCAACAACGG       |
| <i>AtZIP1</i>  | GGACACACACATGGTTCGAC      | GATAGTGCAGCCATGAGTGG       |
| <i>AtZIP3</i>  | CAGAAACATGTTTCTTCTCGTCAC  | CGCAATAAATCCGGTGAACG       |
| <i>AtZIP4</i>  | GATCTTCGTCGATGTTCTTTGG    | TGAGAGGTATGGCTACACCAGCAGC  |
| <i>AtZIP5</i>  | CGGGATTGTTGGCGTGGAAT      | CCAAGACCCTCGAAGCATTG       |
| <i>AtZIP9</i>  | CAATAATCATAGGAATATCGCTTGG | AGAAAGCCATCATGGCAGAT       |
| <i>AtUBQ10</i> | GGCCTTGATAATCCCTGATGAATA  | AAAGAGATAACAGGAACGGAAACATA |

---

\*Sequences of the recombination sites of the Gateway system are underlined

**Table S2. *CaWRKY* groupIII genes**

| Gene symbol      | Gene locus | Domain in homologous gene in <i>Arabidopsis thaliana</i> | Identity | Protein encoded by homologous gene in <i>Arabidopsis thaliana</i> | Identity | Domain in homologous gene in <i>Solanum lycopersicum</i> | Identity | Protein encoded by homologous gene in <i>Solanum lycopersicum</i> | Identity | WRKY domain            |                   | Location            | Group |
|------------------|------------|----------------------------------------------------------|----------|-------------------------------------------------------------------|----------|----------------------------------------------------------|----------|-------------------------------------------------------------------|----------|------------------------|-------------------|---------------------|-------|
|                  |            |                                                          |          |                                                                   |          |                                                          |          |                                                                   |          | Conserved heptapeptide | Zinc-finger type  |                     |       |
| <i>CaWRKY54</i>  | CA01g01280 | AtWRKY41&53                                              | 77.42%   | AtWRKY53                                                          | 27.38%   | SIWRKY54                                                 | 93.65%   | SIWRKY54                                                          | 76.33%   | WRKYGQK                | C <sub>2</sub> HC | 2038036-2040409     | III   |
| <i>CaWRKY53a</i> | CA01g34460 | AtWRKY53                                                 | 77.42%   | AtWRKY53                                                          | 30.71%   | SIWRKY53                                                 | 85.71%   | SIWRKY53                                                          | 57.22%   | WRKYGQK                | C <sub>2</sub> HC | 272190035-272192286 | III   |
| <i>CaWRKY53</i>  | CA01g34470 | AtWRKY53                                                 | 80.33%   | AtWRKY53                                                          | 29.29%   | SIWRKY53                                                 | 90.48%   | SIWRKY53                                                          | 81.32%   | WRKYGQK                | C <sub>2</sub> HC | 272193930-272196370 | III   |
| <i>CaWRKY41a</i> | CA01g34480 | AtWRKY41                                                 | 62.90%   | AtWRKY41                                                          | 21.92%   | SIWRKY54                                                 | 71.43%   | SIWRKY53                                                          | 45.73%   | WRKYGQK                | C <sub>2</sub> HC | 272199809-272204804 | III   |
| <i>CaWRKY70</i>  | CA03g12230 | AtWRKY70                                                 | 60.32%   | AtWRKY70                                                          | 18.53%   | SIWRKY80                                                 | 92.06%   | SIWRKY80                                                          | 64.04%   | WRKYGQK                | C <sub>2</sub> HC | 92810679-92814562   | III   |
| <i>CaWRKY52</i>  | CA03g19220 | AtWRKY41                                                 | 82.26%   | AtWRKY41                                                          | 25%      | SIWRKY52                                                 | 93.65%   | SIWRKY52                                                          | 75.20%   | WRKYGQK                | C <sub>2</sub> HC | 211827372-211829150 | III   |
| <i>CaWRKY41</i>  | CA08g08240 | AtWRKY41&53                                              | 74.19%   | AtWRKY41&53                                                       | 21.43%   | SIWRKY41                                                 | 90.48%   | SIWRKY41                                                          | 75.66%   | WRKYGQK                | C <sub>2</sub> HC | 125184240-125186984 | III   |
| <i>CaWRKY30</i>  | CA10g06890 | AtWRKY30&64                                              | 59.68%   | AtWRKY70                                                          | 13.55%   | SIWRKY81                                                 | 68.84%   | SIWRKY81                                                          | 30.17%   | WRKYGQK                | C <sub>2</sub> HC | 74808336-74809350   | III   |

**Table S3.** Analysis of the *C/S*-elements in the 2-kb promoter fragment of *CaWRKY* groupIII genes

| Gene symbol      | Gene locus        | ABRE | ARE | AuxRR-core | CGTCA-motif | ERE | GARE-motif | HSE | LTR | MBS | TC-rich repeats | TCA-element | TGA-element | W-box | P-box | Total |
|------------------|-------------------|------|-----|------------|-------------|-----|------------|-----|-----|-----|-----------------|-------------|-------------|-------|-------|-------|
| <i>CaWRKY54</i>  | <i>CA01g01280</i> | 0    | 0   | 0          | 1           | 0   | 0          | 3   | 0   | 1   | 3               | 2           | 0           | 0     | 0     | 10    |
| <i>CaWRKY53</i>  | <i>CA01g34460</i> | 0    | 2   | 0          | 2           | 1   | 1          | 0   | 0   | 3   | 1               | 0           | 0           | 1     | 0     | 11    |
| <i>CaWRKY53a</i> | <i>CA01g34470</i> | 0    | 1   | 0          | 0           | 0   | 0          | 2   | 0   | 0   | 2               | 0           | 0           | 0     | 0     | 5     |
| <i>CaWRKY41a</i> | <i>CA01g34480</i> | 1    | 0   | 1          | 4           | 0   | 0          | 0   | 1   | 1   | 0               | 1           | 0           | 1     | 2     | 12    |
| <i>CaWRKY70</i>  | <i>CA03g12230</i> | 0    | 2   | 0          | 4           | 0   | 0          | 0   | 0   | 2   | 2               | 2           | 1           | 1     | 1     | 15    |
| <i>CaWRKY52</i>  | <i>CA03g19220</i> | 0    | 0   | 0          | 0           | 2   | 0          | 2   | 0   | 2   | 2               | 1           | 1           | 1     | 0     | 11    |
| <i>CaWRKY41</i>  | <i>CA08g08240</i> | 2    | 0   | 0          | 0           | 0   | 0          | 0   | 1   | 2   | 4               | 1           | 1           | 3     | 0     | 14    |
| <i>CaWRKY30</i>  | <i>CA10g06890</i> | 0    | 0   | 0          | 0           | 0   | 0          | 3   | 0   | 4   | 0               | 1           | 1           | 1     | 0     | 10    |
